# Supplementary material for: How to Handle CT-Guided Abscess Drainages in Microbiological Analyses? Sterile Vials vs. Blood Culture Bottles for Transport and Processing
Source: MDPI journal article supplement (doi:10.3390/microorganisms9071510), 2021-07-14
Supplement: s1 [file s1]

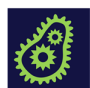

# Supplementary Materials

Table S1 Microorganisms isolated from blood culture or conventional culture method

| Microorganism                  | Blood culture method<br>(Positive specimens n=71) | Conventional method<br>(Positive specimens n=64) |
|--------------------------------|---------------------------------------------------|--------------------------------------------------|
| aerobic gram-negative bacteria | 42                                                | 41                                               |
| Escherichia coli               | 27 (28)                                           | 23 (25)                                          |
| Klebsiella pneumoniae          | 5                                                 | 4                                                |
| Raoultella ornithinolytica     | 2                                                 | 2                                                |
| Citrobacter koseri             | 1                                                 | 1 (2)                                            |
| Proteus mirabilis              | 1                                                 | 2                                                |
| Morganella morganii            | 1                                                 | 1                                                |
| Citrobacter freundii           | 1                                                 | 1                                                |
| Klebsiella oxytoca             | 1                                                 | 1                                                |
| Pseudomonas aeruginosa         |                                                   | 1                                                |
| Haemophilus parainfluenzae     | 1                                                 | 1                                                |
| Enterobacter cloacae           | 1                                                 | 1                                                |
| aerobic gram-positive cocci    | 65                                                | 52                                               |
| Enterococcus faecalis          | 15                                                | 10                                               |
| Staphylococcus aureus          | 12                                                | 8                                                |
| Streptococcus anginosus        | 6                                                 | 7                                                |
| Staphylococcus epidermidis     | 5                                                 | 7                                                |
| Enterococcus faecium           | 6                                                 | 3                                                |
| Streptococcus constellatus     | 4                                                 | 4                                                |
| Streptococcus intermedius      | 3                                                 | 3                                                |
| Streptococcus mitis/oralis     | 4                                                 | 2                                                |
| Staphylococcus hominis         | 2                                                 | 2                                                |
| Enterococcus avium             | 1                                                 | 1                                                |
| Streptococcus agalactiae       | 1                                                 |                                                  |
| Staphylococcus lugdunensis     | 1                                                 | 1                                                |
| Staphylococcus capitis         | 1                                                 | 1                                                |
| Streptococcus salivarius       | 1                                                 | 1                                                |
| Streptococcus sanguinis        | 1                                                 |                                                  |
| Streptococcus cristatus        |                                                   | 1                                                |
| Lactococcus garvieae           | 1                                                 | 1                                                |
| Aerococcus viridans            | 1                                                 |                                                  |
| gram-positive bacilli          | 5                                                 | 4                                                |
| Lactobacillus species          | 2                                                 | 1                                                |
| Actinomyces odontolyticus      | 1                                                 | 2                                                |
| Actinomyces turicensis         |                                                   | 1                                                |
| Rothia mucilaginosa            | 1                                                 |                                                  |

|                                       |       |       |
|---------------------------------------|-------|-------|
| Corynebacterium tuberculostearicum    | 1     |       |
| Anaerobic bacteria                    | 10    | 33    |
| Bacteroides fragilis                  | 3     | 9     |
| Bacteroides thetaiotaomicron          | 3     | 4     |
| Bacteroides ovatus                    |       | 1     |
| Prevotella bivia                      | 1     | 1     |
| Prevotella buccae                     |       | 1     |
| Prevotella oris                       |       | 1     |
| Prevotella melaninogenica             |       | 1     |
| Cutibacterium acnes                   | 1     | 1     |
| Finegoldia magna                      |       | 1     |
| Fusobacterium mortiferum              |       | 1     |
| Parabacteroides distasonis            |       | 1     |
| Bacteroides caccae                    |       | 1     |
| Bacteroides xylanisolvens             |       | 1     |
| not identified to genus/species level | 1 (2) | 5 (9) |
| Fungi                                 | 7     | 11    |
| Candida albicans                      | 3     | 6     |
| Candida parapsilosis                  | 2     | 2     |
| Nakaseomyces glabrata                 | 1     | 2     |
| Candida dubliniensis                  | 1     | 1     |
| total                                 | 129   | 141   |

Displayed are patient numbers characterized by epidemiological and clinical parameters. n=100 specimens were included.
